# Supplementary material
Source: Springer Nature journal article supplement (https://www.springermedizin.de/resource/supplementary/12936_2011_1863_MOESM3_ESM.pdf/9541942)

Treatment Group

- Artesunate multiple dose
- Artemether single dose rectal
- Artemisinin single dose rectal
- Quinine parenteral
- Artemisinin parenteral
- Artesunate single rectal 10mg/kg
- Artemisinin multiple dose rectal

100%

75%

50%

25%

0%

**Proportions still parasitaemic**

**Quinine**

**Artemisinin**

Days since randomisation

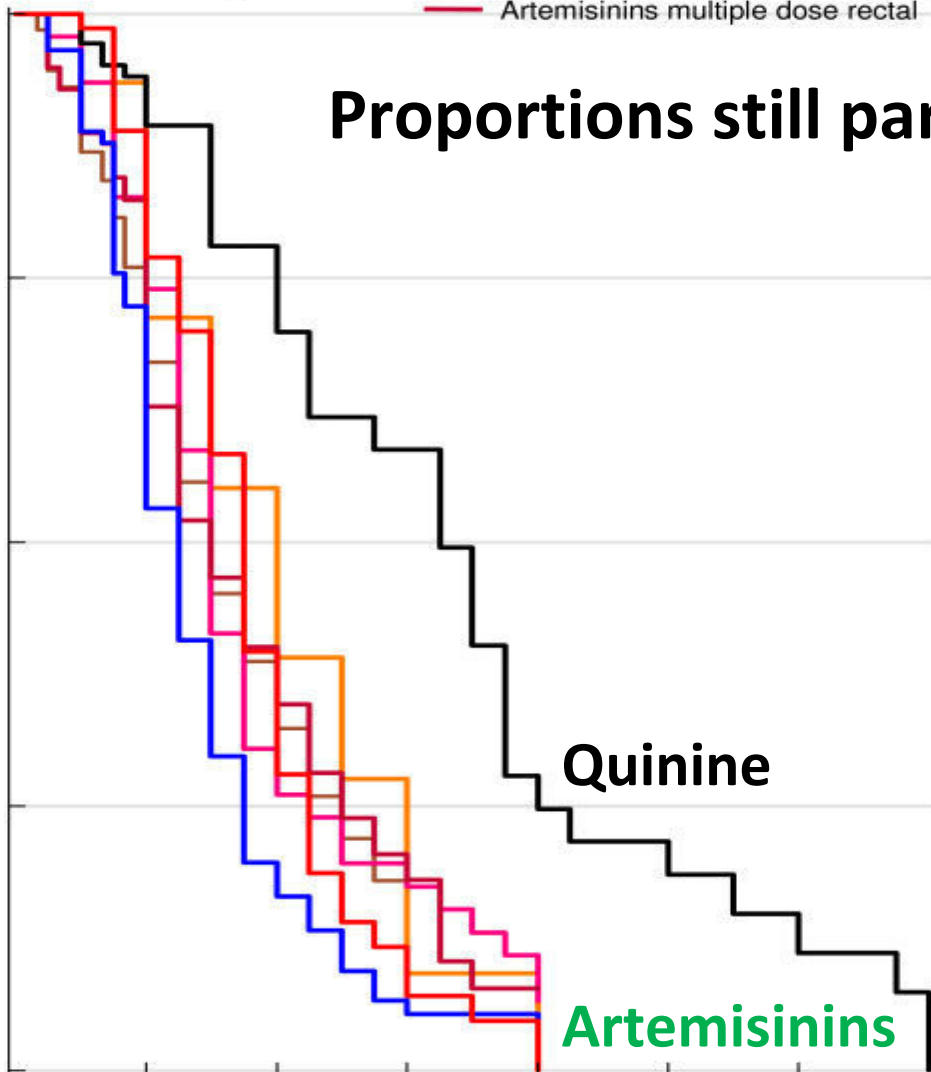

Supplement: MOESM3 [file 9541942]
